# Supplementary material
Source: publisher figshare collection journal article supplement (https://acs.figshare.com/ndownloader/files/9036310)
Supplement: Supplementary file 1 [file 9036310]

# **Supporting Information**

## **Poly-4-vinylphenol (PVP) and poly(melamine-co-formaldehyde) (PMF)-based atomic switching device and its application to logic gate circuits with low operating voltage**

Dong-Ho Kang<sup>1,+</sup>, Woo-Young Choi<sup>1,+</sup>, Hyunsuk Woo<sup>2</sup>, Sungkyu Jang<sup>3</sup>, Hyung-Youl Park<sup>1</sup>,  
Jaewoo Shim<sup>1</sup>, Jae-Woong Choi<sup>3</sup>, Sungho Kim<sup>1</sup>, Sanghun Jeon<sup>2,\*</sup>, Sungjoo Lee<sup>1,3,\*</sup>, and Jin-Hong Park<sup>1,3,\*</sup>

<sup>1</sup> *School of Electronics and Electrical Engineering, Sungkyunkwan University, Suwon 440-746, Korea*

<sup>2</sup> *Department of Applied Physics, Korea University, Sejong 339-700, Korea*

<sup>3</sup> *SKKU Advanced Institute of Nanotechnology (SAINT), Sungkyunkwan University, Suwon 440-746, Korea*

\*Corresponding Author: [jhpark9@skku.edu](mailto:jhpark9@skku.edu) (Prof. J.-H. Park), [leesj@skku.edu](mailto:leesj@skku.edu) (Prof. S. Lee), [jeonsh@korea.ac.kr](mailto:jeonsh@korea.ac.kr) (Prof. S. Jeon)

# Accumulated $I$ – $V$ curves of PVP/PMF-based atomic switching devices with different PVP/PMF ratios

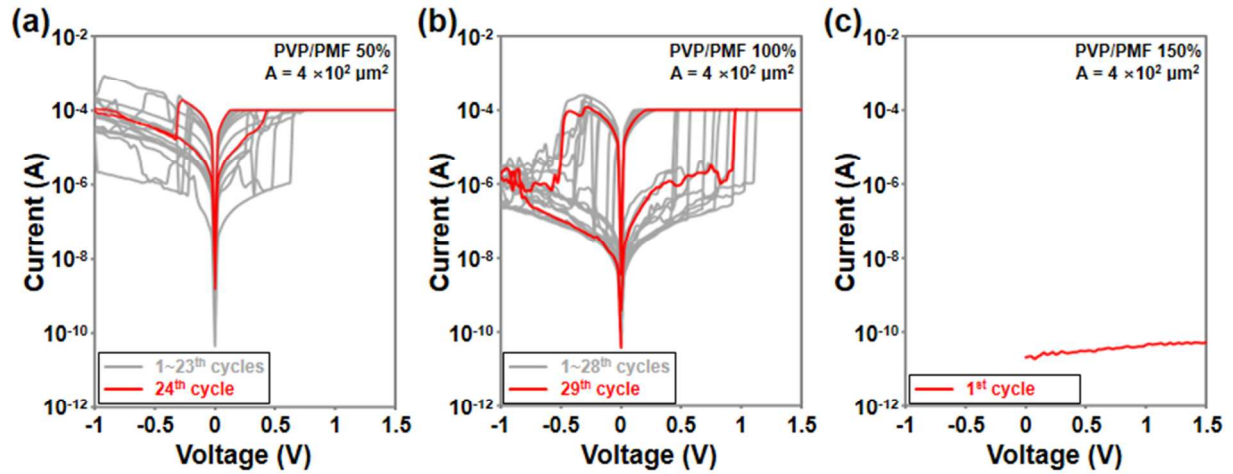

**Figure S1.** Current–voltage characteristics of PVP/PMF-based atomic switching devices with (a) 50%, (b) 100%, and (c) 150% PVP/PMF ratios. The cross-junction area of each PVP/PMF device is  $4 \times 10^2 \mu\text{m}^2$ .

## Thicknesses of PVP/PMF electrolytes (50%, 100%, and 150%), as analyzed by AFM and SEM

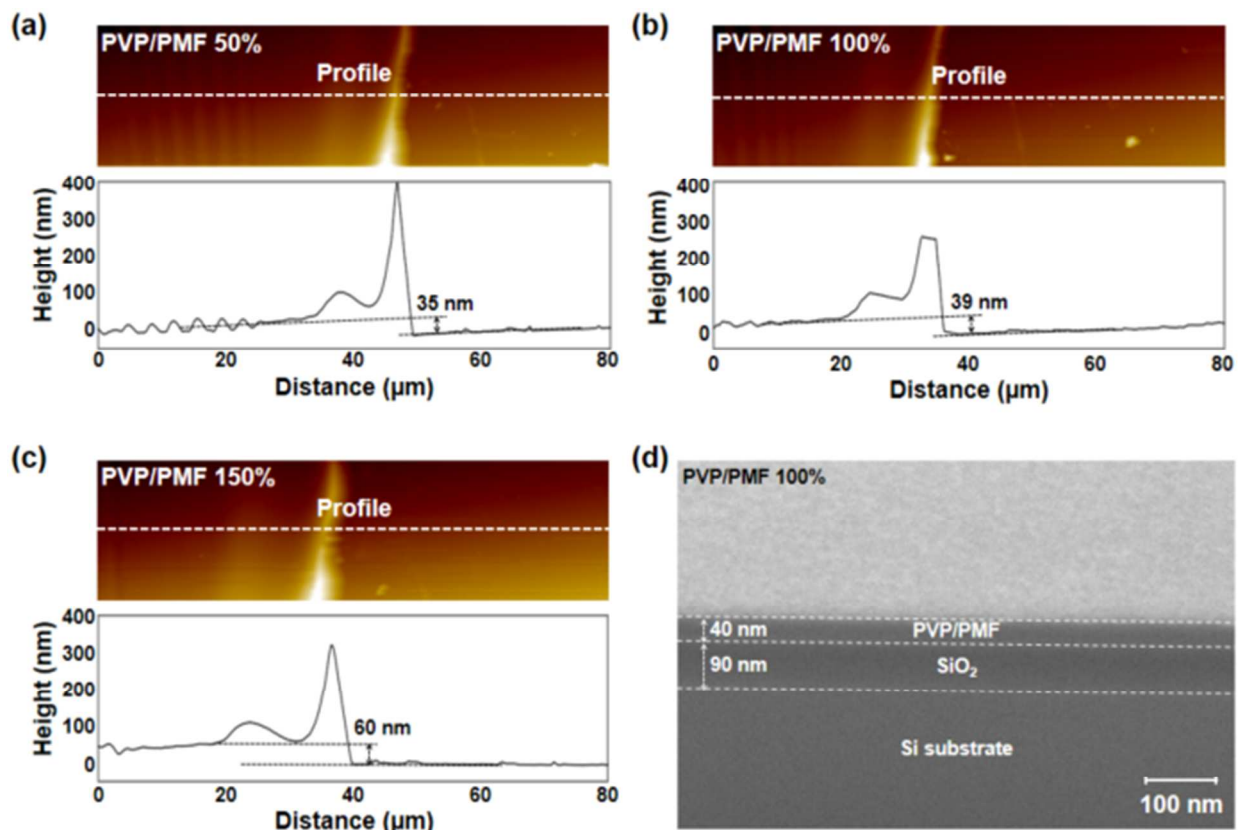

**Figure S2.** AFM analysis of PVP/PMF electrolytes with (a) 50%, (b) 100%, and (c) 150% PVP/PMF ratios. (d) SEM analysis of the 100% PVP/PMF electrolyte. The scale bar is 100 nm.

Figure S2 shows the thicknesses of PVP/PMF electrolytes with different PVP/PMF ratios. According to the AFM results, the thicknesses of 50%, 100%, and 150% PVP/PMF electrolytes were approximately 35, 39, and 60 nm, respectively. In addition, we confirmed the thickness of the 100% PVP/PMF electrolyte by SEM analysis. Once again, the thickness was approximately 40 nm.

**Accumulated  $I$ – $V$  curves of PVP/PMF-based atomic switching devices with/without a Ti buffer layer**

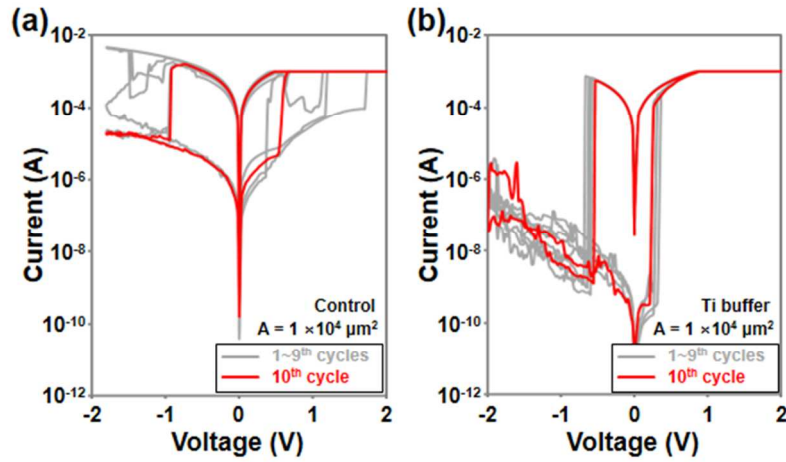

**Figure S3.** Current–voltage characteristics (1<sup>st</sup>–10<sup>th</sup> cycles) of PVP/PMF-based atomic switching devices (a) without and (b) with a Ti buffer layer. The cross-junction area of each PVP/PMF device is  $1 \times 10^4 \mu\text{m}^2$ .

## Applied pulse condition of AC pulse measurement

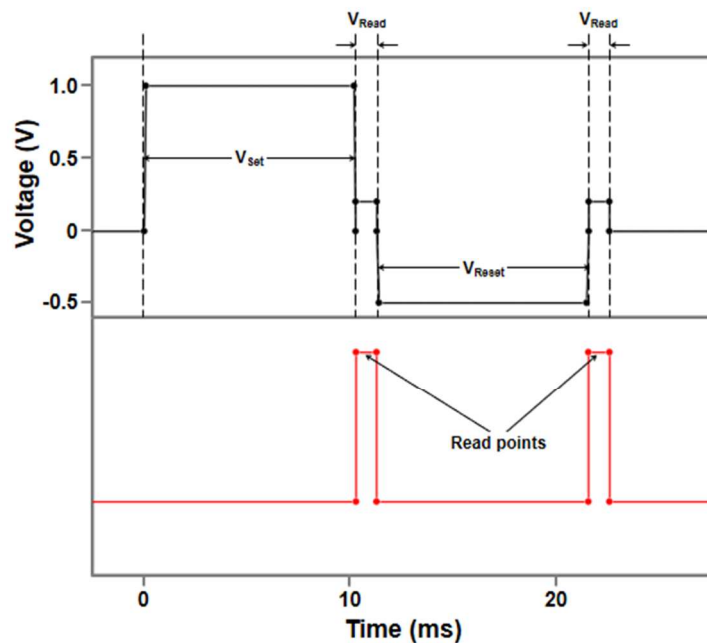

**Figure S4.** The applied pulse condition (black solid line) and read pulse condition (red solid line) of the AC pulse measurement used to determine the cyclic endurance characteristics of the PVP/PMF atomic switching devices.

Figure S4 shows the applied pulse condition of the AC pulse measurement for cyclic endurance determination. Here, the pulse width and rising/falling time are 10 ms and 10  $\mu\text{s}$ , respectively (1.0 V of  $V_{\text{Set}}$  and -0.5 V of  $V_{\text{Reset}}$ ). Moreover, the read voltages (0.2 V of  $V_{\text{Read}}$ ) are set at 1 ms after applying the SET/RESET voltages.

## Retention analysis of PVP/PMF-based atomic switching devices with/without a Ti buffer layer

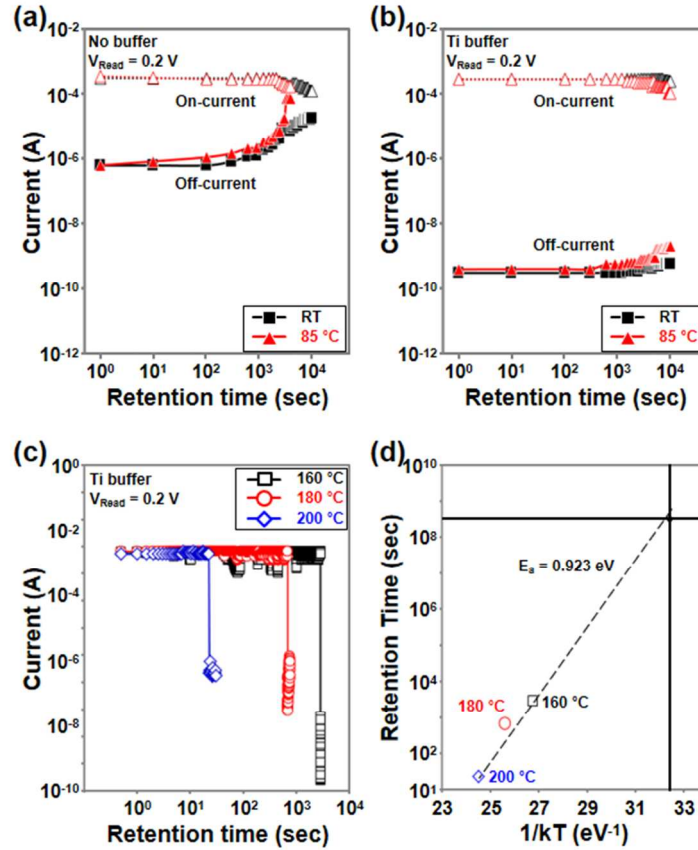

**Figure S5.** Retention analysis of PVP/PMF-based atomic switching devices with/without a Ti buffer layer. On-current (empty circle) and off-current (solid circle) distributions of (a) control and (b) Ti-buffer devices as a function of retention time at room temperature (RT, black circle) and 85 °C (red circle). (c) Retention failure time measurement of on-current at 160 (black), 180 (red), and 200 °C (blue) in the 100% PVP/PMF atomic switching device with a Ti buffer layer. Here, the read voltage ( $V_{\text{Read}}$ ) is 0.2 V. (d) Extrapolation of the retention failure times measured at 160 (black), 180 (red), and 200 °C (blue).

As shown in Figures S5 (a) and (b), the retention failure time (the points at which LRS increases) of the Ti-buffer devices was  $10^4$  s at RT and  $10^4$  s at 85 °C, and that of the control device was  $3 \times 10^3$  s at RT and  $10^3$  s at 85 °C. Thus, the Ti buffer layer can improve the retention time of PVP/PMF devices by donating additional electrons to the PVP/PMF electrolyte and thereby suppressing the oxidation (or decomposition) of the conduction filament. Figure S5 (c) shows the retention time of the on-current measured at different temperatures; the retention failure times were 2861 s, 686 s, and 23 s at 160 °C, 180 °C, and 200 °C, respectively. Therefore, we estimated an activation energy ( $E_a$ ) of 0.923 eV using the Arrhenius plot shown in Figure S5 (d). In conclusion, our 100% PVP/PMF-based atomic switching device with a Ti buffer layer is expected to guarantee HRS/LRS data retention for approximately 10 years at 85 °C.

## Current distribution and 3D CAFM images of 100% PVP/PMF electrolytes with/without a Ti buffer layer

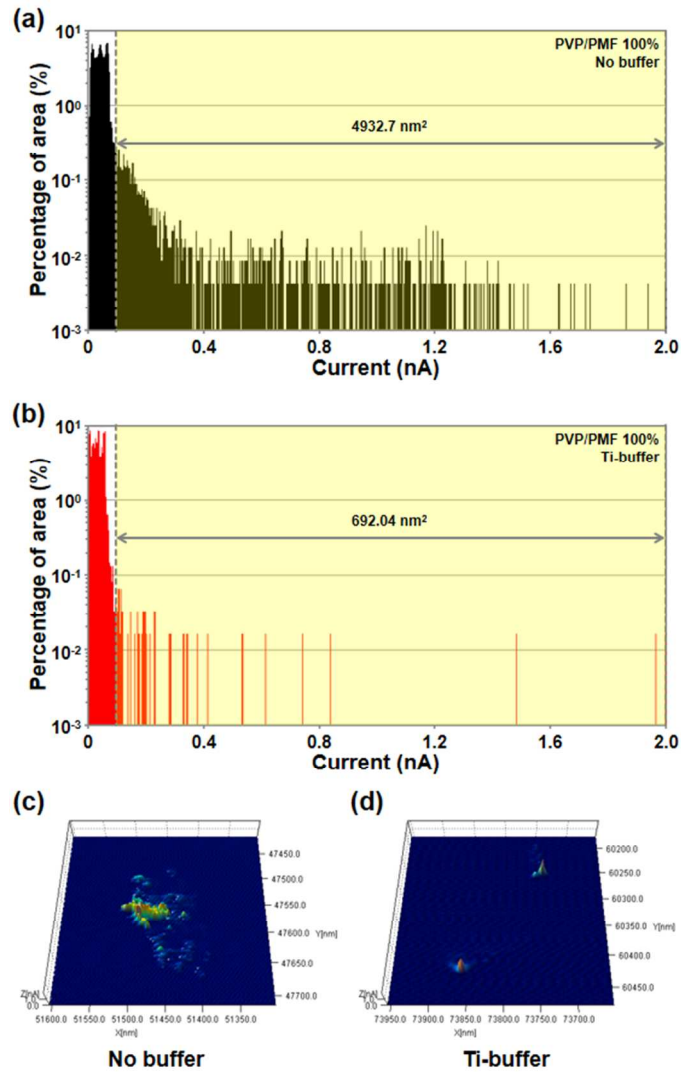

**Figure S6.** Current distributions in 100% PVP/PMF electrolytes (a) without and (b) with a Ti buffer layer. 3D CAFM images of 100 % PVP/PMF electrolytes (c) without and (d) with a Ti buffer layer (corresponding to Figure 3(f)). The size of the CAFM images is  $0.4 \times 0.4 \mu\text{m}^2$ .

Figures S6 (a) and (b) show the current distributions in the 100% PVP/PMF electrolytes of control and Ti-buffer devices. According to the current distribution data, the conduction filament areas ( $> 0.1$  nA) of control and Ti-buffer devices were 4932.7 nm<sup>2</sup> and 692.04 nm<sup>2</sup>, respectively. Compared to the Ti-buffer device, the conduction filament area of the control device was larger by a factor of 7.1.

## Forming voltage variation by PVP/PMF composition ratio and Ti buffer layer insertion

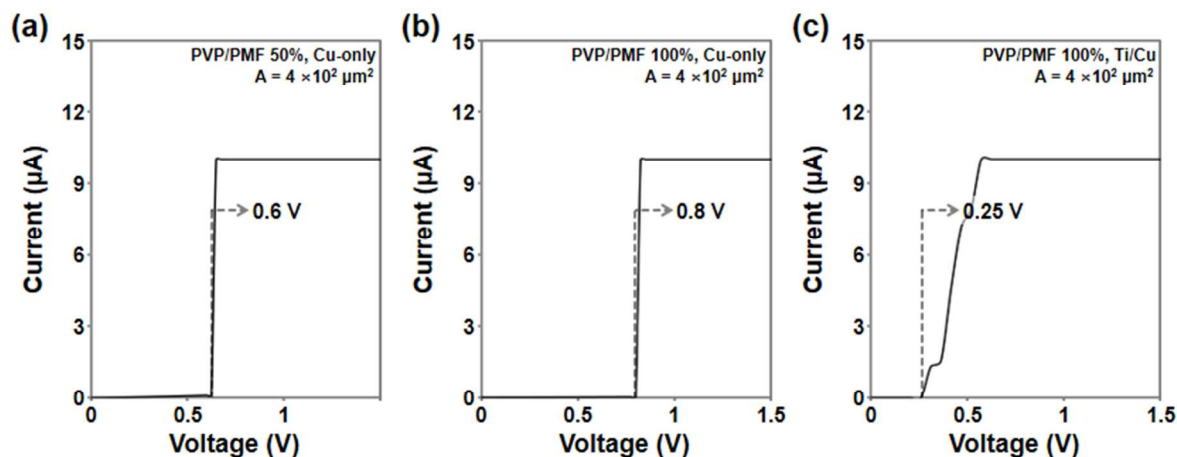

**Figure S7.** 1<sup>st</sup>-cycle I–V curves of (a) 50% and (b) 100% PVP/PMF devices using Cu-only electrodes, and (c) Ti-inserted 100% PVP/PMF devices

To investigate the influence of the PVP/PMF composition and Ti buffer layer on the forming voltage of the PVP/PMF atomic switching device, we compared the 1<sup>st</sup>-cycle I–V curves of 50%/100% PVP/PMF devices using Cu-only electrodes and a Ti-inserted 100% PVP/PMF device. As shown in Supporting Information Figure S7, the forming voltage of the 100% PVP/PMF device was slightly higher than that of the 50% device (50%: 0.6 V and 100%: 0.8 V). This is because increasing the number of cross-linked chains (PVP/PMF ratio  $\uparrow$ ) reduced the number of sites for Cu ion diffusion, thereby raising the activation energy for the formation of conduction filament. In addition, the forming voltage could be reduced by inserting a Ti buffer layer. Compared to the 100% PVP/PMF device using Cu-only electrodes, the Ti-inserted 100% PVP/PMF device had the forming voltage reduced by a factor of approximately 3 (Cu-only: 0.8 V and Ti-inserted: 0.25 V), because the Ti buffer layer provided additional electrons and reduced the activation energy for the formation of conduction filaments.



## Operation of PVP/PMF device-based AND/OR gate circuits

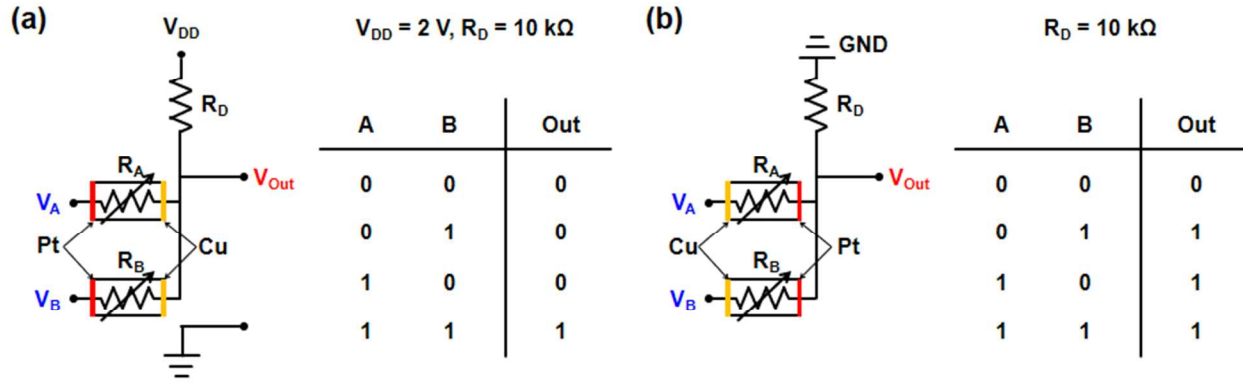

**Figure S8.** Schematic diagrams and truth tables of (a) AND and (b) OR gates. Here,  $V_A$  and  $V_B$  are applied as input bias voltages, and the constant voltage ( $V_{DD}$ ) and resistor ( $R_D$ ) were 2 V and 10 k $\Omega$ , respectively.

Figure S7 (a) shows the AND gate circuit based on two PVP/PMF-based atomic switching devices. Here, input voltages ( $V_A$  and  $V_B$ ) and constant voltage ( $V_{DD}$ ) were applied to the Pt and Cu electrodes of the atomic switches, respectively.

(i) input state 00 (initial state)

Because  $V_{DD}$  was applied to the Cu electrodes of two atomic switching devices, the resistances of both devices ( $R_A$  and  $R_B$ ) have the LRS value (1 k $\Omega$ ). As a result, most of  $V_{DD}$  was dropped in constant resistance ( $R_D$ ), presenting 0 V of  $V_{out}$ .

(ii) input state 00  $\rightarrow$  01

By applying 5 V to the Pt side of device B (input state 01), the B device was turned off, thus giving  $R_B$  the HRS value (10<sup>5</sup> k $\Omega$ ). However, because the parallel resistance of  $R_A$  and  $R_B$  (1 k $\Omega$ ) was still lower than  $R_D$  (10 k $\Omega$ ),  $V_{out}$  was still 0 V.

(iii) input state 01  $\rightarrow$  10

When the input state changed from 01 to 10, the resistance states of devices A and B remained LRS and HRS, respectively, thus increasing  $V_{out}$  instantaneously from 0 to 5 V (calculated by Kirchhoff's law). Because there is no potential difference (or very small potential difference) between the electrodes of device A, the resistance state of device A is not changed ( $R_A$  has LRS value). In contrast, this  $V_{out}$  is newly applied to the Cu side of device B, thus turning on device B ( $R_B$  now has LRS value).

$$\frac{2 - V_{out}}{10} + \frac{5 - V_{out}}{1} = \frac{V_{out} - 0}{10^5}, \quad V_{out} \approx 5 \text{ V}$$

In sequence, as device B is turned on,  $V_{out}$  decreases from 5 V to 2.5 V.

$$\frac{2 - V_{out}}{10} + \frac{5 - V_{out}}{1} = \frac{V_{out} - 0}{1}, \quad V_{out} \approx 2.5 \text{ V}$$

This indicates that the voltage applied to the Cu side of device A is stabilized from 5 V to 2.5 V, consequently turning off device A ( $R_A$  has HRS value). Now, because the voltages applied to the

Cu and Pt sides of device B are 2.5 V and 0 V, respectively, device B is still under on-state ( $R_B$  has LRS value). Therefore,  $V_{out}$  converges to 0 V.

$$\frac{2 - V_{out}}{10} + \frac{5 - V_{out}}{10^5} = \frac{V_{out} - 0}{1}, \quad V_{out} \approx 0 \text{ V}$$

(iv) input state 10  $\rightarrow$  11

By applying 5 V to the Pt side of device B (input state 11), device B is turned off ( $R_B$  has HRS value), thus increasing  $V_{out}$  from 0 V to 2 V.

$$\frac{5 - V_{out}}{10^5} + \frac{5 - V_{out}}{10^5} = \frac{V_{out} - 2}{10}, \quad V_{out} \approx 2 \text{ V}$$

Figure S7 (b) shows the OR gate circuit based on two PVP/PMF-based atomic switching devices. In this case, the input voltages ( $V_A$  and  $V_B$ ) and constant voltage ( $V_{DD}$ ) were applied to the Cu and Pt electrodes of the atomic switches, respectively.

(i) input state 00 (initial state)

$V_{out}$  is 0 V because all external voltages ( $V_A$ ,  $V_B$ , and ground) are 0 V.

(ii) input state 00  $\rightarrow$  01

By applying 2 V of  $V_B$  to the Cu side of device B (input state 01), the resistance state of device B is changed from HRS to LRS ( $R_B = 1 \text{ k}\Omega$ ). Because the total resistance of  $R_A$  and  $R_D$  in parallel (10 k $\Omega$ ) is higher than  $R_B$ , most of  $V_B$  is dropped in the resistance of  $R_A \parallel R_D$ . Therefore,  $V_{out}$  increases from 0 V to 2 V.

(iii) input state 01  $\rightarrow$  10

When the input state changes from 01 to 10,  $R_A$  and  $R_B$  still have HRS and LRS values, respectively, thus decreasing  $V_{out}$  instantaneously from 2 V to 0 V. As a result, device A is turned on while 0 V is applied to the Pt side of device A ( $R_A$  has LRS). Because there is no potential difference (or small potential difference) between the Cu and Pt electrodes of device B,  $R_B$  still has its LRS value.

$$\frac{2 - V_{out}}{10^5} = \frac{V_{out} - 0}{1} + \frac{V_{out} - 0}{10}, \quad V_{out} \approx 0 \text{ V}$$

In sequence, as device A is turned on,  $V_{out}$  increases from 0 V to 1 V.

$$\frac{2 - V_{out}}{1} = \frac{V_{out} - 0}{1} + \frac{V_{out} - 0}{10}, \quad V_{out} \approx 1 \text{ V}$$

This result indicates that the voltage applied to the Pt side of device B is increased from 0 V to 1 V, thus turning off device B ( $R_B$  has HRS value). Meanwhile, device A is still under on-state ( $R_A$  has LRS value) because the voltages at the Cu and Pt sides of device A are 2 V and 1 V, respectively. As a result, most of  $V_A$  is dropped in the parallel resistance of  $R_B \parallel R_D$  because  $R_B \parallel R_D$  (10 k $\Omega$ ) is higher than  $R_A$  (1 k $\Omega$ ). Therefore, final  $V_{out}$  becomes 2 V.

(iv) input state 10  $\rightarrow$  11

When 2 V is applied to the Cu side of device B (input state 11), device B can be turned on ( $R_B$  has LRS value) or maintained ( $R_B$  has HRS value), where  $V_{out}$  is still 2 V.

$$\frac{2 - V_{out}}{1} + \frac{2 - V_{out}}{1} = \frac{V_{out} - 0}{10}, \quad V_{out} \approx 2 V$$

Here, we assume that the operating speed of the two atomic switching devices is slower than the change in the input state.
